# Supplementary material for: Nature based solutions for flood risks: What insights do the social representations of experts provide?
Source: PLOS journal article supplement (doi:10.1371/journal.pwat.0000116), 2023-11-01
Supplement: S2 (10.1371/journal.pwat.0000116.s002) [file journal.pwat.0000116.s002]

## Sheet: Tableau
Thèmes	Sous-thèmes	Discours	Réflexion
Leviers aux SFN	Besoin de nature en ville	S. C. "il y a quand même une demande sociale de nature en ville donc ça passe mieux" IR "On a imaginé de rapprocher les conceptions de nature en ville avec les besoins de nature dans le sens large"
	Bonne définition	RB "Oui on se sert des références internationales notamment de l'UICN on ne cherche pas à réinventer la roue la. Nous on a l'impression que c'est relativement bien défini "
	Accessibiilté scientifique	RB "Oui tout à fait c'était le but! Le revers de ça c'est que le dimensionnement des sfn mis en place a utilisé très très peu d'imput scientifique, d'ingénierie, de projection climatique "
	Différentes sources de financements	ML "on peut potentiellement aller chercher des financements qui sont issues d'autres politiques sectorielles pour préserver la biodiversité" "aller chercher des financements qui aujourd'hui qui ne sont pas dédiés à la biodiversité mais qui sont dédiés à la politique agricole, climatique et les faire venir sur la biodiversité"							alt+entrée
	Soutien institutionnel	ALM "accompagnement par l'agence de l'eau très important et qui a joué un rôle " ML "ce sont eux qui sont vraiment à l'origine de ce concept depuis une dizaine d'années après c'est vrai qu'ils ont vraiment fait avancer les choses sur la scène internationale"
	Gouvernance inclusive	MT "On est en recherche je pense aussi bien du côté du Symadrem que du côté conservatoire du littoral et le cogestionnaire d'avoir une vision et une stratégie commune sur ce territoire" "on peut peser dans les décisions qui sont prises et on est évidemment force de proposition" "il y a la volonté de part et d'autre de travailler en bonne intelligence" CDP "chaque acteur du territoire qui pourra s…
	Soutien habitants	MC "il y a un propriétaire là sur le petit Rhône on lui prend à peu près un tiers de ses plantations donc c'est énorme mais pour le coup je vous donne cet exemple parce que ce monsieur nous soutien"
	Mesures ORC	CDP "maintenant quand on fait des travaux sur les digues, comme on détruit une partie de milieux naturels, on fait des mesures qu'on appelle de compensation" MC "une mesure de compensation prioritaire ça va être de travailler sur la ripisylve, essayer de faire en sorte de viser la continuité "
Freins aux SFN	Concept difficilement applicable	S. B. " sur les territoires les collectivités qui font vraiment au sens de la définition de l'uicn il n'y en a pas tant que ça" "si on veut appliquer à la lettre toute la définition de l'iucn ça devient compliqué de trouver véritablement ce qui rentre dedans." "elle est assez contraignante" RC "qu'on a du mal nous à matérialiser et à rendre opérationnel cette idée, ce concept " "On a du mal à s'a…
	Pas assez de preuves par l'exemple	S. C. "ce site pilote sert à faire la preuve par l'exemple pour montrer que ça marche" RB "ce qu'il faut maintenant c'est des retours d'expériences" ALM "quels sont les gains réels, est-ce que ça vaut vraiment le coup de se lancer dans ce type de démarches est-ce que ça ne va pas coûter plus cher" TG "je suis en attente des opérations concrètes des solutions fondées sur la nature"
	Définition large et floue	S. C. "je ne suis pas fan de distinguer sfn et safn parce que ça brouille un peu le message" "la région avait pour objectif de développer le bois énergie, ce qui est en contradiction avec les sfn" "les sfn il y a 8 défis sociétaux notamment la sécurité alimentaire ou l'approvisionnement en bois [...] s'il y a un arbitrage à faire entre protéger la forêt contre le changement climatique et prendre …
	Frein psycho-sociologique	S. C. "il y a aussi la montée du niveau de la mer et les gens depuis des générations ils ont tout fait pour prendre les terres sur la mer [... ] on leur dit qu'ils doivent abandonner les terres et donc ça passe très mal. Ça c'est sur le littoral c'est encore plus prégnant qu'ailleurs" "sur le littoral c'est compliqué (cf parce qu'il n'y a pas ou peu de besoin/demande de nature) [...] ils ont insi…
	Terme conceptuel et utilisé dans une sphère scientifique et institutionnelle et non par les personnes de terrain	S. C. "j'ai eu beaucoup de critiques déjà c'est porté par l'OFB qui est un gros organisme d'état j'ai eu des critiques comme quoi on restait beaucoup entre nous" ALM "que les acteurs de terrain ne connaissent pas forcément d'ailleurs" "Je trouve qu'il y a vraiment une distinction entre les organismes qui portent ce concept et qui essaient de le faire prendre au niveau local et ce niveau local qui…
	Discours à adapter selon l'interlocuteurs ( et ses préjugés, son niveau de connaissance de compréhension…)	S. C. "Selon les gens avec qui tu parles avec des gens de la biodiversité ils ont l'impression que les sfn sont du greenwashing si tu vas parler avec les gens de la forêts ils vont dire qu'on est trop pour la biodiversité, il faut vraiment adapter le discours" "ils ont tout de suite mis en avant l'aspect biodiversité devant les chefs de l'OFB [...]ils parlaient des inondations quand ils s'adressa…
	Problèmes fonciers	S. C. "la seule solution pour l'instant c'est de faire une expropriation et ça ce n'est pas la solution la plus durable surtout si tu veux entretenir bien ta sfn" ML "gros gros frein c'est l'acquisition foncière " CR "ce qui va poser beaucoup problème c'est le foncier"
	Impossibilité physique, technique	S. C. "en montagne c'est compliqué d'aller dire aux collectivités de ne pas construire de digues parce qu'elles n'ont pas énormément de choix"
	Recherche	F. R. "on fait de la recherche finalisé donc on voudrait que ce qu'on met en place soit utilisé mais en fait je ne sais pas qu'elle est la proportion de recherches qui finit dans les tiroirs ou qui n'est pas utilisées ou dont on ne s'approprie pas les choses alors que ça pourrait être très pertinent. "
	Apriori	ALM "quels sont les gains réels, est-ce que ça vaut vraiment le coup de se lancer dans ce type de démarches est-ce que ça ne va pas coûter plus cher que ce qu'elles font déjà, elles ont plein d'aprioris" RC "Mon point de vue n'est pas forcément critique ni sceptique mais très interrogatif sur le concept" CR "les collectivités sont encore un peu frileuses parce qu'elles ne savent pas si ces soluti…
	Manque d'informations, de sensibilisation, de culture du risque	ALM "elles ont besoin d'être informé là-dessus" "là on est vraiment sur des questions de négociation pure et d'explication, de pédagogie, auprès des agriculteurs" CDP "des brèches qui se sont créés et ça a été le point de départ de très grosses incompréhension de la part de la population. " FC "certaines villes qui sur des projets d'aménagement, refusaient des noues ou autres parce qu'ils ne sava…
	Opposition habitants	ALM "pour avoir un projet vertueux de l'amont jusqu'à l'aval il aurait fallu complètement rouvrir ce ruisseau à l'amont donc sur les parcelles agricoles et il y a eu un frein, une opposition assez forte de ces exploitants" "c'était vraiment un frein psychologique de la part des agriculteurs qui étaient vraiment contre qui avaient une posture opposé sur le principe" MT "ce n'est pas forcément très…
	Opposition communes	ALM "réticence des communes concernées à faire des travaux importants "
	Difficulté d'entente entre acteur, institution	CDP "Que la nature soit gagnante en plus de l'objectif qu'on disait au départ. En tout cas au Symadrem c'est comme ça. Après je ne pense pas que *** vous dise la même chose parce que eux travaillent pour la nature c'est leur objectif premier" "Il y a parfois des désaccords [...] nous proposions des choses qui ne sont pas bien reçues en face et inversement" FC "Aujourd'hui la métropole comme beauc…
	Entretien	FC "on aurait pu pour gérer les eaux pluviales du boulevard urbain est choisir de faire d'autres types d'ouvrages mais on est parti sur une noue pour essayer d'améliorer la biodiversité" "nécessite que l'ouvrage [...] que son entretien soit en partie financé par d'autres services type espace vert" MP "la maintenance du site que c'est plus compliqué, dans la pérennisation du système " CR "le probl…
	Manque de financements	FC "aujourd'hui c'est un problème de moyens" "il y a un problème derrière de financements, de moyens associés" RC "il y aussi peut-être un point qui nous ralenti ou complique les choses ce sont nos sources de financement " "il y a plusieurs études sur lesquelles on a sollicité des financements à l'agence de l'eau sur les zones d'expansion de crues en faisant référence aux SFN nos demandes n'ont p…
	Retard en France	ML "en France ce n'est pas encore très développé on est un petit peu en retard"
Bienfaits des SFN	Débloque des financements	S. C. "nous on peut avoir des financements autre (autre que ERC grâce à SfN) ALM "impulsion des principaux financeurs qui lancent soit des appels à projet soit des grands prix soit des appels à manifestation d'intérêt [...] c'est vraiment un concept phare [...] Autant les agences de l'eau, l'acd biodiversité, la caisse des dépôts et de consignation, l'ademe, l'ofb sont vraiment très engagé"
	Bon outils de communication	F .R. "appropriation par notamment les pouvoirs publics qui fait qu'on entend le mot partout […] il faut se saisir aujourd'hui et il y a vraiment l'opportunité"
	Echelle globale	S. C. "qu'une sfn ce n'est pas un projet d'aménagement c'est un projet de territoire donc encore plus large à l'échelle du bassin versant"
	Gouvernance	F. R. "réconcilie les conservateurs de la nature et les aménageurs" CR "on est là plutôt pour essayer de faire en sorte qu'on parle tous de la même chose et de développer encore plus en fait ce concept là "
	Participation	S. C. "Pour moi les habitants devraient participer (au suivi des ouvrages)" F.R. "c'est quelque chose qui est très incitatif […] quand vous mettez un projet mettez tout le monde autours de la table. En fait on a un peu enfoncé le clou en l'écrivant noir sur blanc" RB "une des choses qu'on a remarqué qui faisait que les sfn avait beaucoup d'avantages c'est qu'elle impliquait une participation bien…
	Economie de coûts	RB "avec l'objectif que les coûts de gestion soient moindre et qu'il fasse faire moins de travaux de maintenance des digues" MT "l'économie en terme de dépenses publiques et puis au coup d'aménagement et d'entretien des ouvrages" "La dimension économique est essentielle, je pense que c'est l'argument massue pour les décideurs qui vont attribuer ou pas les financements." ML "moins coûteuse " CR "c…
	Solution sans regret	RB "solutions sans regrets: elles ont tellement de cobénéfices qu'importe les projections climatiques" CR "sfn on parle aussi de solution sans regrets"
	Réduction du risque	ALM "il y a eu un gain certain en matière de réduction du risque à la fois de débordement de cours d'eau et de ruissellement "
	Gain biodiversité	ALM "un retour d'un certain nombre d'espèce" CR "gain de biodiversité"
	Acculturation	ML " Des SFN pour maintenir une culture de décrue qui était favorable aux espèces de zones humides mais qui également permettaient aux populations riveraines de maintenir leur culture traditionnelle de décrue qui avait été supprimé avec le barrage CR "c'est quand même un terme qui permet une meilleur acculturation à la fois des élus et des citoyens"
	Evite nuisibles	CR "Si la noue végétalisée est bien faite il n'y a pas de problème normalement l'eau ne doit pas rester plus de 24 heures, elle doit s'infiltrer donc il y a des dimensionnements de ces structures-là qui sont faites pour justement éviter ces problématiques de nuisibles"
Critique des SfN	Expropriation	S. C. "La seule solution pour l'instant c'est de faire une expropriation et ça tu sais mieux que moi que ce n'est pas la solution la plus durable surtout si tu veux entretenir bien ta sfn." MC "une fois que le projet sera déclaré d'utilité publique c'est ce qui justifie que derrière on a le droit d'exproprier des personnes privés"
	Difficulté GEMAPI	F. R. "Après il ne faut pas se leurrer, 9 fois sur 10 tout dépend de comment on le présente ce sont des projets qui serve la PI c'est le but un peu final. Quand on fait de la GEMA bah on dit on fait de la GEMA pour faire de la zone humide par exemple on va mettre en avant le fait que ça peut servir à la PI. L'inverse est plus rare [...] on fait d'abord de la PI on utilise des méthodes qui ne sont…
	Politique	F. R. "je me rends compte qu'aujourd'hui qu'on est dans un milieu dans lequel parfois ce n'est pas tant les chercheurs qui sont déconnectés du monde réel c'est ceux qui prennent les responsabilités qui ne connaissent pas tout ça"
	Effet de mode	RB "certains chercheurs qui ont du mal à accepter les concepts à la mode" ALM "un concept à la mode" RC "un concept qui est très porteur et très à la mode"
	Rigueur scientifique	RB "les bases de rigueur scientifique soient toujours bien présentes" ALM "pas du tout basé sur des éléments factuels ou scientifique" "ceux qui mettent vraiment en œuvre les sfn sur le terrain à mon avis n'ont pas forcément cette idée du caractère scientifique de la mesure qu'ils mettent en œuvre"
	Acceptabilité	RB "la notion de l'acceptabilité elle est un peu ambigüe et piégeuse parce que dis quand même tentative de faire accepter quelque chose qui est conçue en dehors des préoccupations de la population"
	Economie	RB " les travaux, le btp, ces solutions grises ou dures génères des bénéfices économiques ou financiers qui sont différents […] c'est une redistribution des flux d'argent [...] ça peut faire moins d'emplois, un peu moins de croissance"
	Problème compréhension	ALM "au niveau des collectivités elles-mêmes n'en saisissent pas forcément bien la portée, elles ont du mal à comprendre concrètement ce que c'est justement qu'elle est la différence par rapport à des solutions vertes qu'elle mettait déjà en œuvre" RC "très interrogatif sur le concept"
	Idéologie écologiste	ALM "au risque de considérer que c'est un petit peu trop une posture idéologique à la base beaucoup sont un petit peu méfiant en se disant on nous vend un concept là mais c'est un concept d'écologiste est-ce qu'on a vraiment l'intérêt et l'utilité?" "ils [les agriculteurs] ont considéré que c'était une solution écologique et écologiste donc très teinté d'idéal " LE "contre les écologistes de Cama…
	Pas de différence avec solution écolo déjà existante	ALM "qu'elle est la différence par rapport à des solutions vertes qu'elle mettait déjà en œuvre" "pour eux [ind. terrain] ça reste vulgairement de l'ingénierie écologique, de la solution un peu plus verte [...] PE "Nous on considère que de l'agroécologie ça peut être une SFN CR "principalement ça va être de l'ingénierie écologique"
	Remise en cause protection risque	ALM "votre projet une fois qu'il est terminé vous pouvez me garantir qu'il va vous garantir qu'il va vous protéger contre une crue centennale et bien là il y a un blanc c'est à dire qu'on a pas la réponse […] Certes il y a des modélisations qui ont été faites bien évidemment [...] mais le projet n'ayant jamais été forcément soumis à un aléas de cette intensité-là se pose vraiment la question de s…
	Expropriation	ML "ça va être très compliqué pour la commune de récupérer ces terrains soit en utilisant l'expropriation "
	Polysémie nature	ET "le mot nature à la base c'est que ce mot est très polysémique est très très vaste et prête à confusion" DM "Solutions fondées sur la nature houla je n'ai jamais réfléchi à cette question. Je suppose que ce serait des aménagements d'espace plutôt vert "
Définition des SFN	Cobénéfices	S. B. "ce sont des solutions qui vont avoir à la fois un impact sur la gestion du risque inondation, sur le phénomène d'inondation et qui en parallèle vont aussi avoir d'autres bénéfices en particulier sur la biodiversité ou l'amélioration du cadre de vie " S.C. "Les cobénéfices, il faut que ça s'appuie sur les écosystèmes donc préservation, gestion, restauration " F.R. "le fait de définir les SF…
	Changement de principe, de paradigme	ET "c'est une opposition de principe" "on change de manière de réfléchir " ML "changement de paradigme"
	Vision, échelle large	S. C. "qu'une sfn ce n'est pas un projet d'aménagement c'est un projet de territoire donc encore plus large à l'échelle du bassin versant." ALM "comment la solution va vraiment pouvoir permettre une adaptation du secteur ou plus globalement d'un territoire plus large"
	S'appuyer sur les écosystèmes	S. C. "préservation, gestion, restauration" "c'est souvent des actions de gestion et de préservation d'abord" "qu'il faut du positif, de la création de biodiversité" R.B. "d'adaptation basée sur les écosystèmes " MT "se servir en quelque sorte des fonctions que peuvent apporter des zones humides littorales en tant que tampon face aux évènements de submersion marine " "on va utiliser les fonctions…
	Compensation n'en fait pas partie	S. C. "on dit que la compensation ne rentre pas dans les sfn mais pour autant on ne dit pas que ce n'est pas utile l'ERC [...]( principe éviter-réduire-compenser) c'est utile mais c'est réglementaire et nous on peut avoir des financements autre que des financements liés à un impact donc on va travailler en complément."
	Alternative à solution grise	F. R. "en alternatives à des solutions grises " PE "globalement les infrastructures grises qui sont verdis on considère que ça en est pas." SC "ne pas construire de digues "
	Complémentaire à solution grise	ALM "une solution complémentaire à une solution dite grise" "nous on ne les oppose pas […] on ne considère qu'il n'y a pas de solutions grises contre des solutions vertes" ML "Non ce sont des solutions complémentaires" ET "qu'on ne va pas penser une substitution totale mais une articulation entre ces deux pratiques. " CR "c'est la conjugaison des deux qui va permettre vraiment de s'adapter au pro…
	Anthropisation inévitable	RB "c'est un rétablissement d'un fonctionnement hydrologique un peu plus naturel, on ne dit pas complètement naturel parce que la Camargue est une zone de toute façon artificialisé"
	Biodiversité	ALM "ce qui est vraiment important c'est l'aspect biodiversité" ML "un gain net pour la biodiversité"
	Changement climatique	ALM "adaptation au changement climatique" MT "ça inclut tout un volet d'adaptation aux effets du changement climatique et à l'élévation du niveau marin "
	Cas par cas, adaptabilité	ALM "Je ne prends pas la sfn comme une solution miracle qui serait à caler sur tous les cas de figure et efficace pour tous les types d'inondations" PE "le fait que ce soit adaptable"
	Solution mixte n'en font pas partie	PE "Tout ce qui est digues enfin nous ce qu'on s'appelle structures grises. Pour nous on n’est pas sur des SFN"
	Solution mixte en font partie	MT "ce qu'on considère être une solution mixte [...] ce n'est pas que de la solution fondée sur la nature parce qu'on a besoin en amont d'une digue à la mer qui soit en bon état" CDP "on a utilisé de la Chaux […) en terme d'impact paysagé, d'impact sur le milieu naturel et d'impact économique ça peut être très intéressant " FC "Il pourrait n'y avoir que du végétal, ce n'est pas le cas de beaucoup…
	Restauration milieu naturel	CDP "ça permet au fleuve de retrouver sa mobilité" "retourner à un fonctionnement naturel"
	Intention préalable au projet	PE "les deux essentiels sont le fait qu'on a un gain de biodiversité pour répondre au risque inondation mais on a un autre critère qu'il faut qu'on ait l'intention d'y répondre"
	Circuit court	MC "on va venir prendre les matériaux de ces terres agricoles pour faire la future digue. Le but c'est qu'il n'y ait aucun apport qui vienne de l'extérieur, qu'on se serve des matériaux locaux "
	Economiquement viable	PE "le fait que ce soit économiquement viable "
	Actions concrètes	PE "on est vraiment des actions concrètes" ML "les SFN ce sont vraiment des actions concrètes"
SfN = pas nouveau	Techniques proposées qui ne sont pas nouvelles	S. C. "les sfn inondations c'est très documenté on sait ce qui marche et ce qui ne marche pas " ""Nouveau non parce que c'est la simplicité, rustique, rudimentaire mais efficace. C'est pas nouveau c'est sûr " F.R. "Nouveau oui et non : le terme est nouveau, la façon d'afficher le concept oui ça va un peu plus loin que les précédents après les approches cobénéfices ça existe depuis des lustres." "…
	Concept récent	MT "Nous on s'en est vraiment emparé de ce concept il y a vraiment 4-5 ans" "Le libellée de sfn est récent" FC "on a rien adapté pour que ce soit des sfn c'est juste que le vocabulaire n'existait pas"
Nouveauté apporté par SfN	Cobénéfices	MT "ce qui est un petit peu nouveau c'est la dimension assez intégrée par rapport aux enjeux qui est donnée aux sfn, les ambitions aussi en matière de biodiversité" "qu'on va chercher à la fois à trouver une solution à un problème qui peut affecter les populations humaines [...] mais en ayant également de fortes ambitions en matière de biodiversité et de restauration écologique" CR "le côté des c…
	Changement climatique	ML "Le concept de SFN pour moi il est nouveau parce que justement il rend explicite la relation avec le défi sociétal "
	Langage	TG "C'est un langage assez nouveau pour nous "
Techniques de SFN utilisées	Techniques SFN	S. B. "la restauration des zones humides, ou la végétalisation" "désartificialisation de certains territoires pour favoriser l'écoulement de l'eau" S. C. "la restauration d'une zone humide " "la restauration des restanques" "recharges sédimentaires sur la Durance" "la restauration du Parc des Aygalades à Marseille " RB "rétablissant le fonctionnement hydraulique " ALM "pour le débordement de cour…
Projets de SFN existants	Projets SfN existants	S. C. "la restauration d'une zone humide "le marais de l'Estagnol" "a la restauration du Colostre de Brômes" "la restauration du Parc des Aygalades à Marseille " "l'exemple du Palyvestres" RB "digue à la mer" "en Camargue [...] rétablissement d'un fonctionnement hydrologique un peu plus naturel" "sur la première digue la plus proche de la mer on a fait volontairement des brèches pour laisser la m…
Aspects PSE
	Attachement au lieu	AG "Les gens ont un attachement à la valeur patrimoniale de l'objet digue ancien tel qu'il est et ils n'arrivent pas à accepter qu'on fasse autrement. "	Les individus sont attachés à l'objet "digue" malgré le fait qu'elle ne les protège plus. Cet affect fait que les ind sont dans le déni du risque, refusent le changement et notamment les SfN
Laisser plus de place à la nature et aux aléas	Laisser plus de place à nature	RB "l'idée c'est de laisser plus [+] la mer entrer " ALM "essayer de favoriser l'avantage d'un retour de la nature " "redonner plus de place à l'eau " MT "renoncer à entretenir ces ouvrages, d'accepter un recul progressif du trait de côte" "accepter que la mer rentre dans tous ces étangs qui redeviennent une zone tampon au-dessus de la digue à la mer, évidemment ça va à rebours de l'histoire de l…	Les SfN sont pensées et conçues pour laisser plus de place à la nature. Une idée globale positive contre laquelle on imagine pas des indidividus s'y opposer. Mais de façon plus précise cela implique de de savoir incorporer ses besoins à des processus naturels, ne plus complètement contrôler les aléas et la faune/flore et aussi potentiellement apprendre à vivre avec des espèces animales considérés…
	Incompréhension	RB "effectivement les populations environnantes certains comprennent d'autres moins qu'on laisse venir la mer alors que ça fait 100 ans que tout est fait pour la contenir"
Climatoscepticisme	Déni total	RB "le changement climatique en Camargue ça n'a pas été un sujet très discuté jusqu'à présent bizarrement " "On sait bien qu'ils vont souffrir de l'élévation du niveau de la mer mais en fait c'est trop lourd, c'est longtemps resté trop lourd notamment le maire des Sainte-Marie de la mer ne voulait jamais en entendre parler ou prononcé le mot" CDP "il y aussi beaucoup de déni [...] à une réunion a…	Le Climatosceticisme serait un moyen de se protéger contre la peur du CC. Méthodologie d'évitement? Les SfN ne viendraient malheureusement pas amener de l'apaisement
	Déni anthropique		Pas de déni anthropique relevé alors qu'aujourd'hui la plus grande forme de climatoscepticisme est celle anthropique SfN vient aggraver le climatosceptisme en ajoutant de la peur? (contrôle, risque insecte..)
Biais	Biais culturel: impression de protection	RB "il y a un biais culturel qui fait qu'on se sent protégé derrière un ouvrage de génie civil" "on a vu avec ce qu'il s'est passé au moment de Xynthia ou de la Nouvelle-Orléans en 2004 on sait qu'on est pas protégé pour de vrai" "l'impression de protection" CDP "il y a même une demande un peu général de la population de dire renforcer tout, rehausser tout, on veut plus de protection [...] Il y a…	Réalité digue abîmée ancienne, abîmée: MC "Ce qu'il faut aussi savoir c'est que les travaux aujourd'hui sur le petit Rhône on sait que grosso modo il y a une chance sur deux " "on a des digues qui ne sont pas fiables " AG "on a réfléchi à différents scénarios de réaménagement de site parce qu'en gros elles s'écroulent, elles sont mortes complètement " L'impression de proctection diminue la cultur…
	Changement d'habitude	RB "ça fait plus de 100 ans que les Camarguais se protègent contre la mer et changer ça du jour au lendemain voilà pour eux on a toujours fait comme ça on va continuer on ne va pas perdre les efforts qu'on fait nos parents, grands-parents, arrière grands-parents"	L'habitude qui rejoint aussi le besoin de contrôle, on n'a pas l'habitude de laisser de la place à la nature
	Besoin de maîtriser	MT "Il y a une culture de la maîtrise et de la domination des espaces naturelles" CDP "il y a même une demande un peu général de la population de dire renforcer tout, rehausser tout, on veut plus de protection" ET "quand on fait des SFN on est pas en maîtrise de la globalité du système auquel on touche mais on va plutôt essayer de guider un système en aménageant un milieu en espérant qu'une biocé…	Le déni du CC et le refus des SFN sont intimement liés et les individus en voyant les effets directement du CC en camargue rejette donc en bloque le CC et les SfN d'autant plus lorsque qu'ils sont livré à eux-même et en manque de socialisation comme la période du covid.
	Aspect identitaire	CR "ça nous blesse parce que c'est vrai que eux font des choses là-dessus depuis 40 ans"	Sentiment de déni de leur travail quand ils entendent que les SfN sont nouvelles, innovantes alors qu'ils utilisent les tehcniques d'ingénierie végétale depuis des 10 années sur le terrain. Déni de leur travail et de leur identité d'ingénieur, d'écologue
Affect, peur	Insecte	IR "la peur du moustique "	La peur du nuisible qui rejoint le besoin de maitriser la nature, le besoin de contrôle
	Sentiment de perte	LE "ils ont le même droit qu'avec mais maintenant tout le monde a le même droit. Ils n'ont pas perdu quelque chose mais ils ont besoin de partager et c'était douloureux et même s'il y avait des sensibilisations ça n'était pas très bien vu" AG "il y a la problématique de perte de terre"	Sentiment de perte de privilèges, diminution de l'optimisme comparatif
	Déplacement peur	LE " "les gens se sentent menacé par nous" "on pensait que peut-être avec le covid ça baisserait les tensions mais en fait c'était le contraire"	La peur des personnes qui œuvre pour l'écologie, comme si il était plus confortable pour les habitants de Camargue de les porter responsables des effets du CC et de voir les personnes de la biodiv comme une menace. Sorte de déni pour dissimuler la vrai menace: le CC
